# Supplementary material for: Optical source apportionment and radiative effect of light-absorbing carbonaceous aerosols in a tropical marine monsoon climate zone: the importance of ship emissions
Source: Copernicus journal article supplement (doi:10.5194/acp-20-15537-2020), 2020-12-15
Supplement: Supplementary file 1 [file acp-20-15537-2020-supplement.pdf]

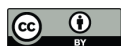

*Supplement of*

## **Optical source apportionment and radiative effect of light-absorbing carbonaceous aerosols in a tropical marine monsoon climate zone: the importance of ship emissions**

**Qiyuan Wang et al.**

*Correspondence to:* Qiyuan Wang (wangqy@ieecas.cn) and Junji Cao (cao@loess.llqg.ac.cn)

The copyright of individual parts of the supplement might differ from the CC BY 4.0 License.

**Table S1.** Summary of aerosol light absorption from primary emissions ( $\text{Abs}_{\text{pri}}(\lambda)$ ) and secondary formation ( $\text{Abs}_{\text{sec}}(\lambda)$ ) during the campaign.  $\lambda$  represents the wavelength of 370, 470, 520, 590, 660, or 880 nm.

| Type                           | Light absorption<br>( $\text{Mm}^{-1}$ ) | Standard deviation<br>( $\text{Mm}^{-1}$ ) | Absorption fraction<br>(%) |
|--------------------------------|------------------------------------------|--------------------------------------------|----------------------------|
| $\text{Abs}_{\text{pri}}(370)$ | 14.9                                     | 8.6                                        | 95                         |
| $\text{Abs}_{\text{sec}}(370)$ | 0.8                                      | 1.8                                        | 5                          |
| $\text{Abs}_{\text{pri}}(470)$ | 10.8                                     | 5.7                                        | 96                         |
| $\text{Abs}_{\text{sec}}(470)$ | 0.5                                      | 0.9                                        | 4                          |
| $\text{Abs}_{\text{pri}}(520)$ | 9.1                                      | 4.7                                        | 96                         |
| $\text{Abs}_{\text{sec}}(520)$ | 0.4                                      | 0.7                                        | 4                          |
| $\text{Abs}_{\text{pri}}(590)$ | 7.8                                      | 4                                          | 96                         |
| $\text{Abs}_{\text{sec}}(590)$ | 0.3                                      | 0.6                                        | 4                          |
| $\text{Abs}_{\text{pri}}(660)$ | 6.6                                      | 3.3                                        | 97                         |
| $\text{Abs}_{\text{sec}}(660)$ | 0.2                                      | 0.4                                        | 3                          |

**Table S2.** Results of bootstrap analysis.

|                         | Motor vehicle emissions | Ship emissions | Fugitive dust | Biomass burning | Unmapped |
|-------------------------|-------------------------|----------------|---------------|-----------------|----------|
| Motor vehicle emissions | 50                      | 0              | 0             | 0               | 0        |
| Ship emissions          | 0                       | 49             | 1             | 0               | 0        |
| Fugitive dust           | 0                       | 1              | 49            | 0               | 0        |
| Biomass burning         | 0                       | 0              | 3             | 47              | 0        |

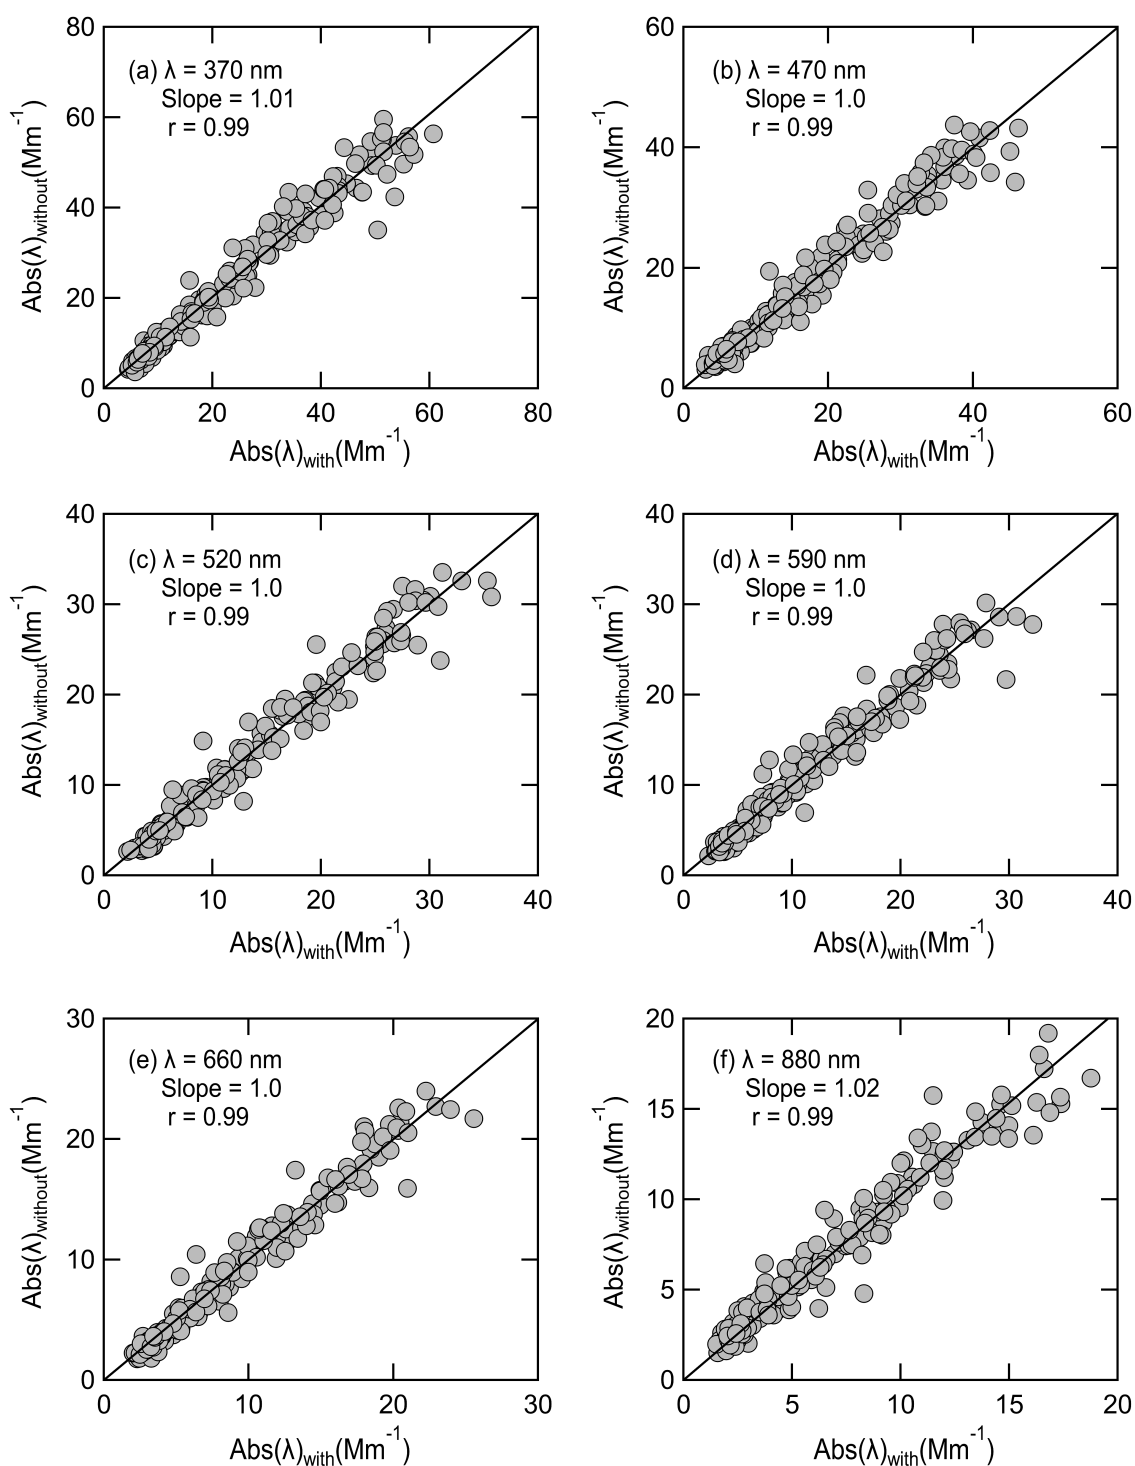

**Figure S1.** Scatter plots of light absorption coefficients measured with ( $\text{Abs}(\lambda)_{\text{with}}$ ) and without ( $\text{Abs}(\lambda)_{\text{without}}$ ) Nafion dryer (MD-700-24S-3).  $\lambda$  is the wavelength of 370, 470, 520, 590, 660, or 880 nm.

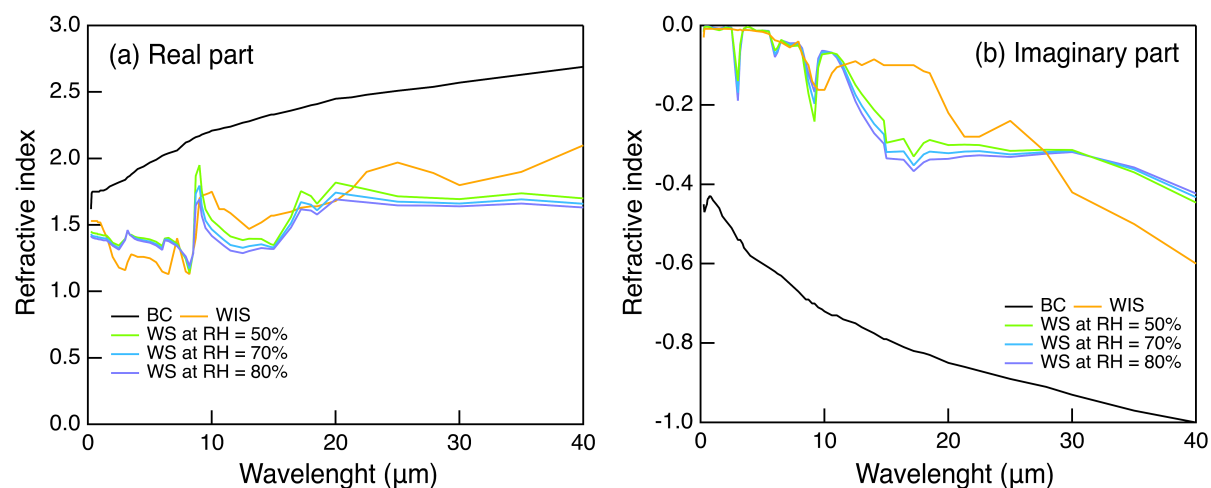

**Figure S2.** The refractive index (real part and imaginary part) of black carbon (BC), water-soluble (WS) components at different relative humidity (RH), and water-insoluble (WIS) components used in the Optical Properties of Aerosols and Clouds (OPAC) model.

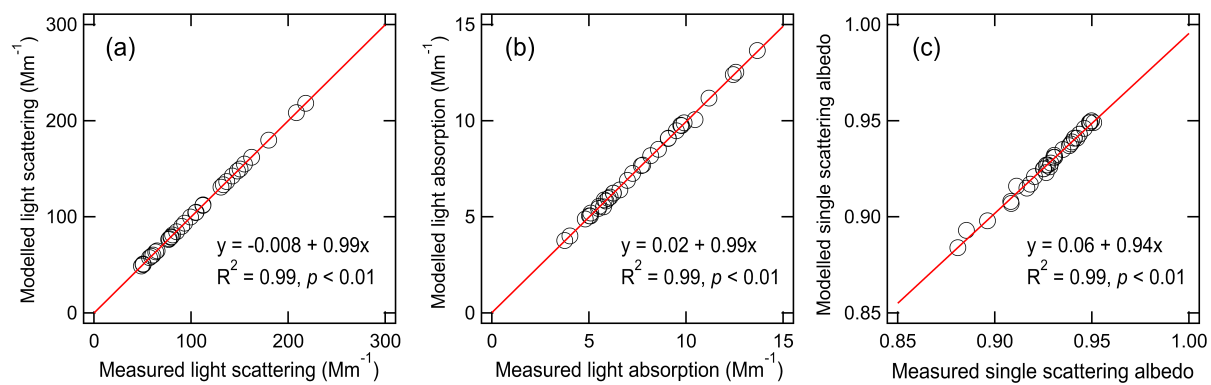

**Figure S3.** Scatter plots of optical parameters modelled with Optical Properties of Aerosol and Cloud model versus values measured with a photoacoustic extinctionsimeter.

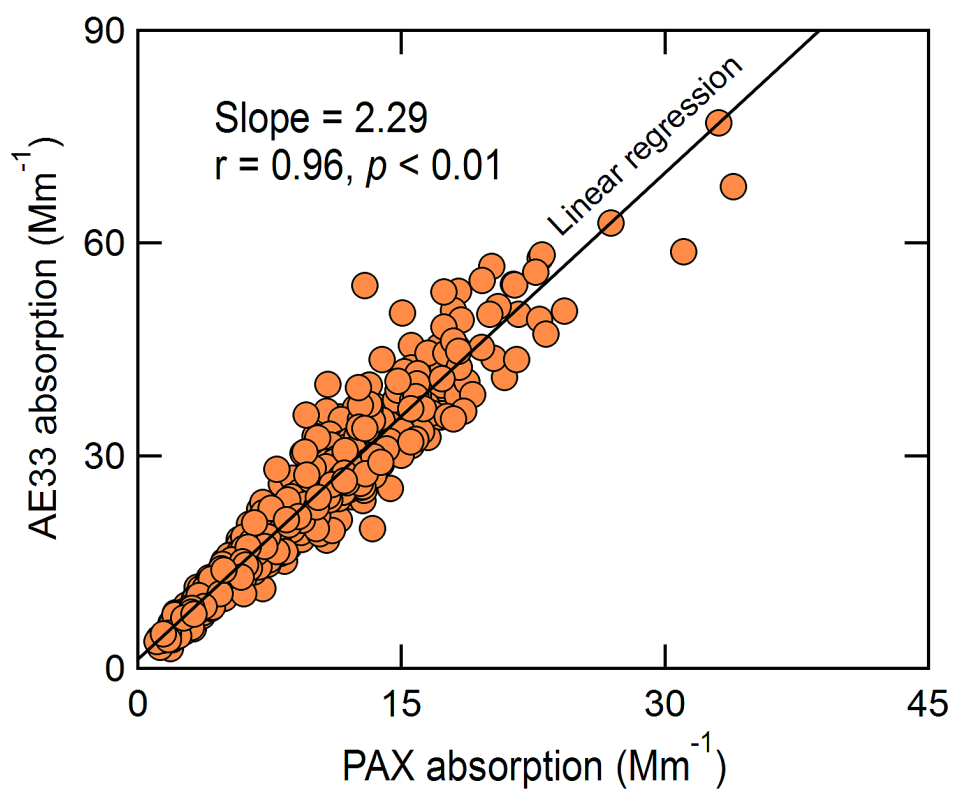

**Figure S4.** Relationship between the light absorption coefficient measured using a model AE33 aethalometer at wavelength of 520 nm and a photoacoustic extinctionsmeter (PAX) at wavelength of 532 nm.

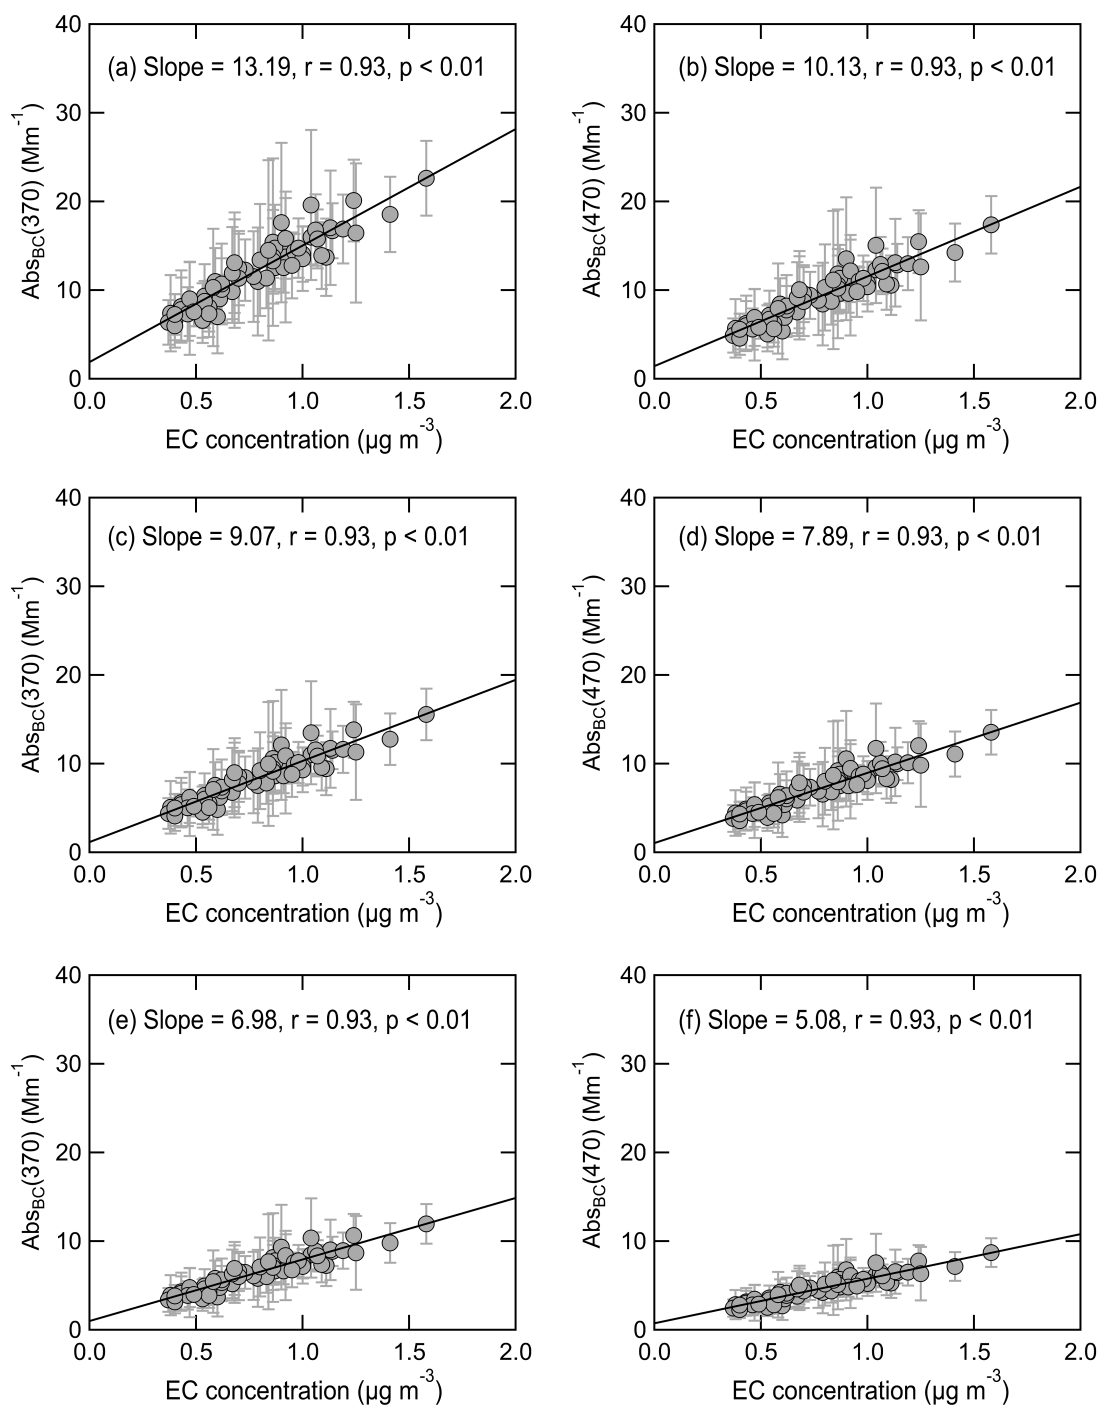

**Figure S5.** Scatter plots of light absorption of black carbon at different wavelengths ( $Abs_{BC}(\lambda)$ ,  $\lambda = 370, 470, 520, 590, 660$ , and  $880$  nm) versus mass concentration of elemental carbon (EC). The black lines are the linear regression. The vertical error bars represent one standard deviation of  $Abs_{BC}(\lambda)$ .



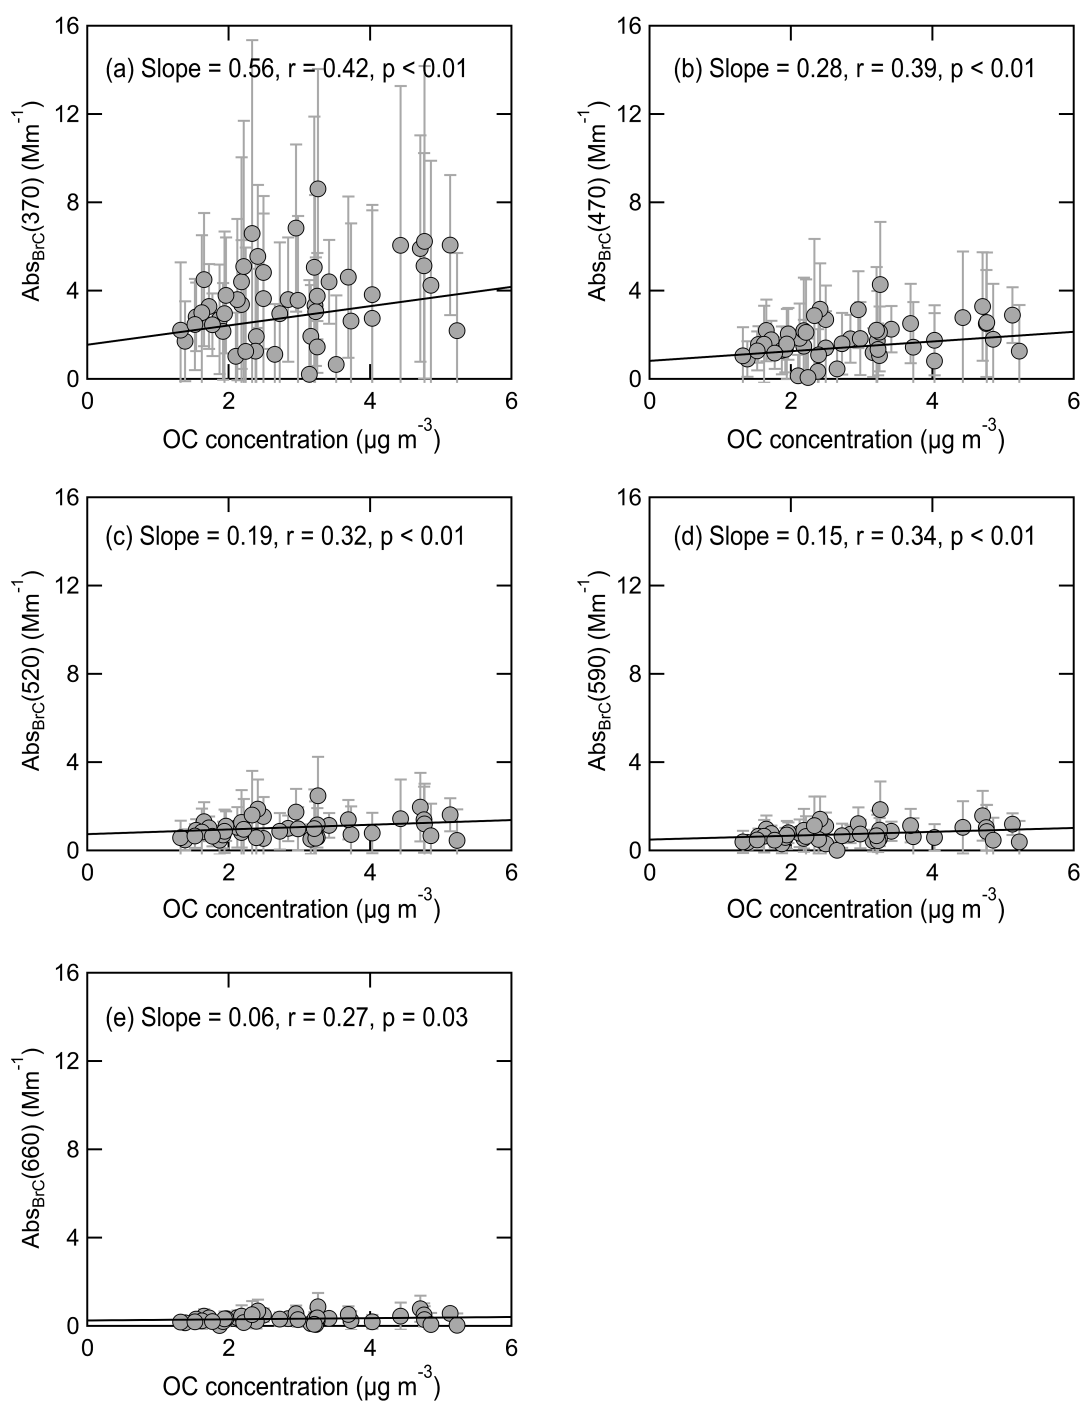

**Figure S6.** Scatter plots of light absorption of brown carbon at different wavelengths ( $\text{Abs}_{\text{BrC}}(\lambda)$ ,  $\lambda = 370, 470, 520, 590$ , and  $660$  nm) versus mass concentration of organic carbon (OC). The black lines are the linear regression. The vertical error bars represent one standard deviation of  $\text{Abs}_{\text{BrC}}(\lambda)$ .

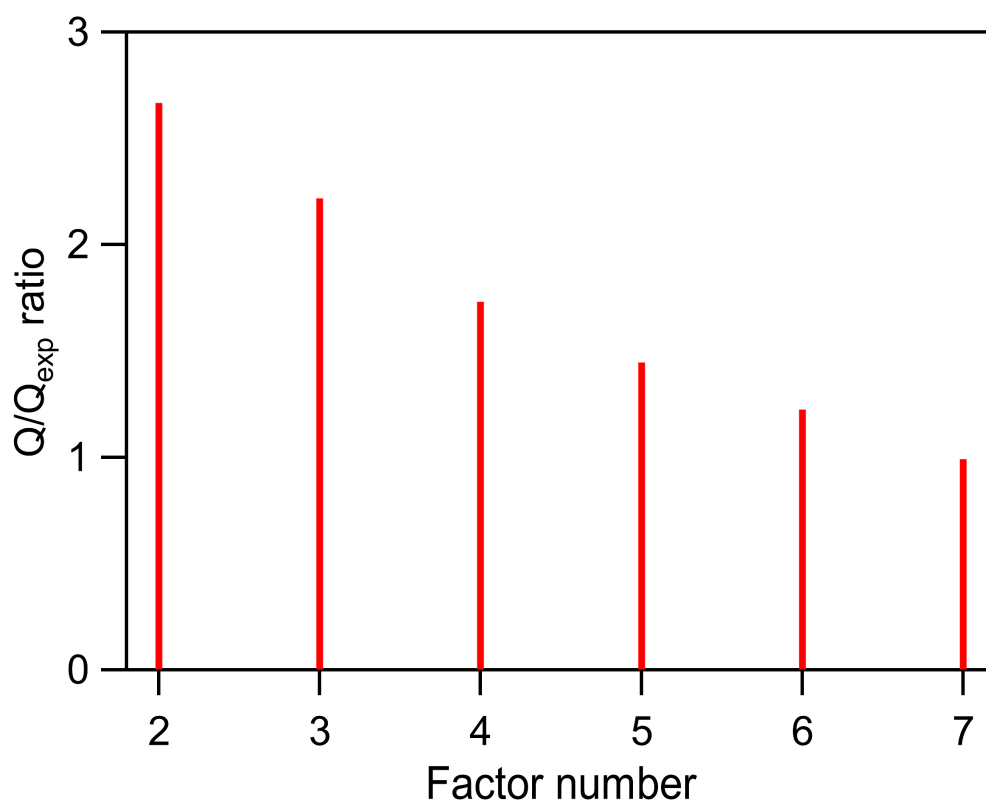

**Figure S7.** The  $Q/Q_{\text{exp}}$  ratio as a function of factor number.

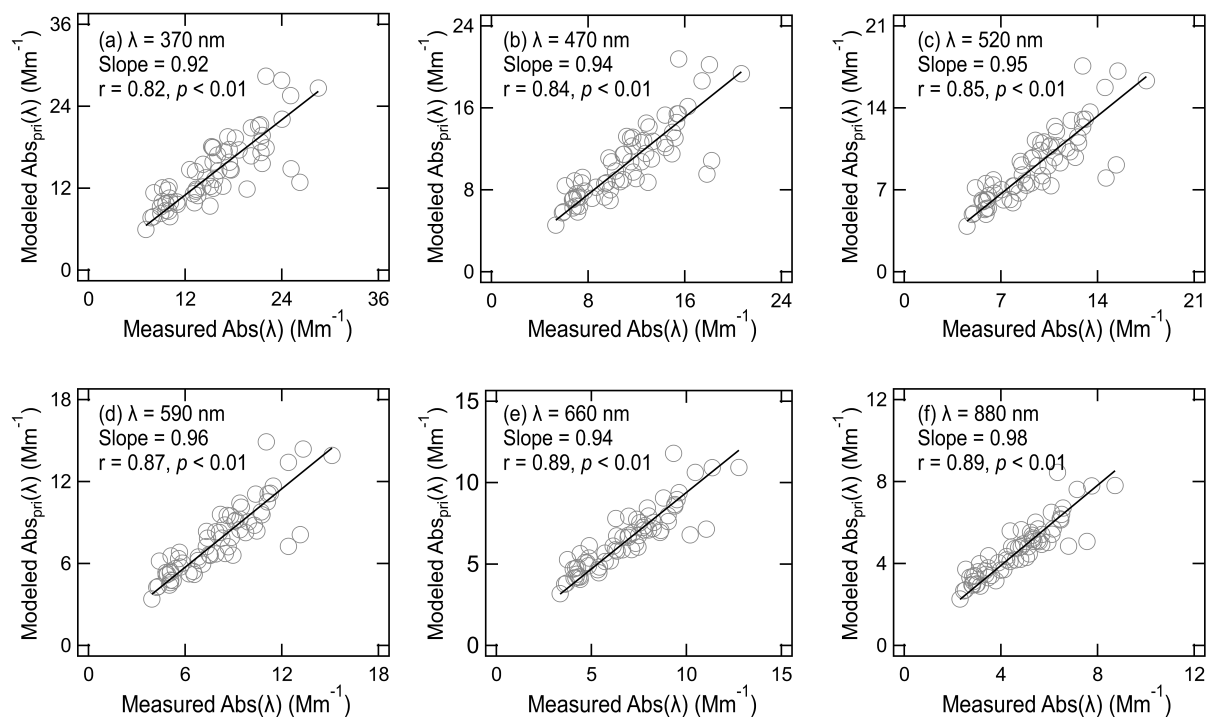

**Figure S8.** Scatter plots of primary aerosol light absorption ( $\text{Abs}_{\text{pri}}(\lambda)$ ,  $\lambda = 370, 470, 520, 550, 660$ , or  $880$  nm) simulated with a positive matrix factorization model versus light absorption ( $\text{Abs}(\lambda)$ ) measured with AE33 aethalometer.
